# Supplementary material for: NO oxidation catalysis on copper doped hexagonal phase LaCoO3: a combined experimental and theoretical study
Source: Royal Society of Chemistry journal article supplement (doi:10.1039/c3cp54963a), 2014-01-01
Supplement: c3cp54963a.pdf [file c3cp54963a.pdf]

## Supporting information

### **NO Oxidation Catalysis on Copper Doped Hexagonal Phase**

### **LaCoO<sub>3</sub>: A Combined Experimental and Theoretical Study**

Chen Zhou,<sup>‡a</sup> Xiao Liu,<sup>‡b,c</sup> Chunzheng Wu,<sup>a</sup> Yanwei Wen,<sup>c</sup> Yejian Xue,<sup>a</sup> Rong  
Chen,<sup>b</sup> Zhaoliang Zhang,<sup>d</sup> Bin Shan,<sup>\*c</sup> Hongfeng Yin,<sup>\*a</sup> and Wei Guo Wang<sup>a</sup>

<sup>a</sup>Division of Fuel Cell & Energy Technology, Ningbo Institute of Material Technology and Engineering, Chinese Academy of Sciences, Ningbo 315201, Zhejiang, People's Republic of China

<sup>b</sup>State Key Laboratory of Digital Manufacturing Equipment and Technology and School of Mechanical Science and Engineering, Huazhong University of Science and Technology, Wuhan 430074, Hubei, People's Republic of China

<sup>c</sup>State Key Laboratory of Material Processing and Die and Mould Technology and School of Materials Science and Engineering, Huazhong University of Science and Technology, Wuhan 430074, Hubei, People's Republic of China

<sup>d</sup>College of Chemistry and Chemical Engineering, University of Jinan, Jinan 250022, Shandong People's Republic of China

## 1 Experimental methods

Appropriate amounts of  $\text{La}(\text{NO}_3)_3 \cdot 6\text{H}_2\text{O}$ ,  $\text{Sr}(\text{NO}_3)_2$ ,  $\text{Co}(\text{NO}_3)_2 \cdot 6\text{H}_2\text{O}$  and  $\text{Cu}(\text{NO}_3)_2 \cdot 3\text{H}_2\text{O}$  were dissolved in deionized water followed by vigorous stirring for 1 hours. Subsequently, CA and EDTA were added with the molar ratio of EDTA: CA: total metal ions (TM) = 1:2:1. The mixture was kept in a water bath at 90 °C with constant stirring. Water was slowly evaporated until the solution became a viscous gel and began evolving NO/NO<sub>2</sub> gas. Subsequently the gel was dried in the oven at 120 °C for 3 hours and then heated up to 150 °C and kept at 150 °C overnight. The resulting solid was grounded and heat-treated in two steps: the first calcination step was performed at 550 °C for 2 hours in air to eliminate organic constituents and the second at 700 °C for 5 hours to form the perovskite oxide.

The reference sample 2% Pt/Al<sub>2</sub>O<sub>3</sub> was prepared by the wet-impregnation method. A certain amount of  $\gamma\text{-Al}_2\text{O}_3$  was immersed in  $\text{Pt}(\text{NO}_3)_2$  solution at known concentration. The mixture was stirred at room temperature until the powders were well moistened and the solution was fully absorbed. The precursor was heated at 100 °C for 6 hours and then was calcined at 500 °C for 2 hours.

## 2 Results

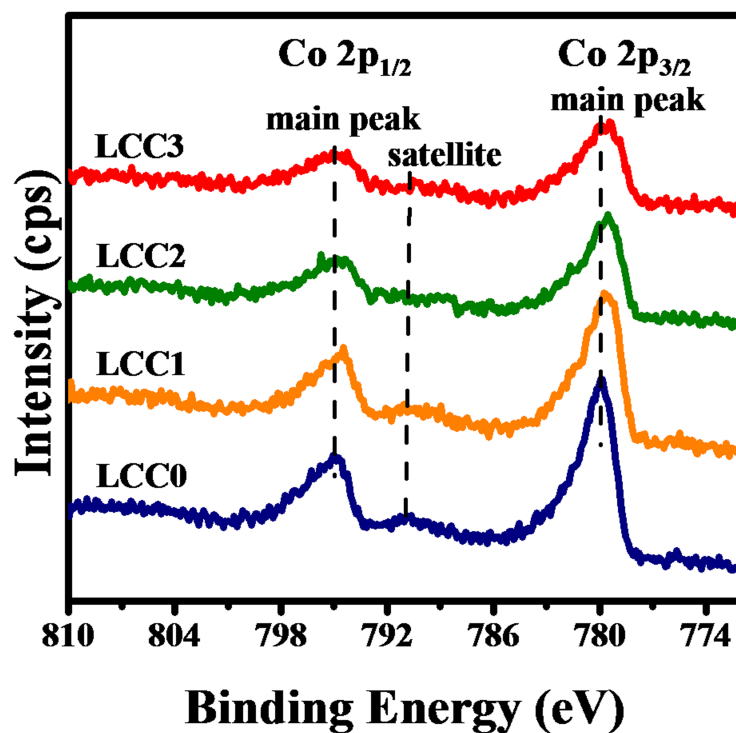

Figure S1 (color online) XPS spectra of Co 2p as a function of composition.

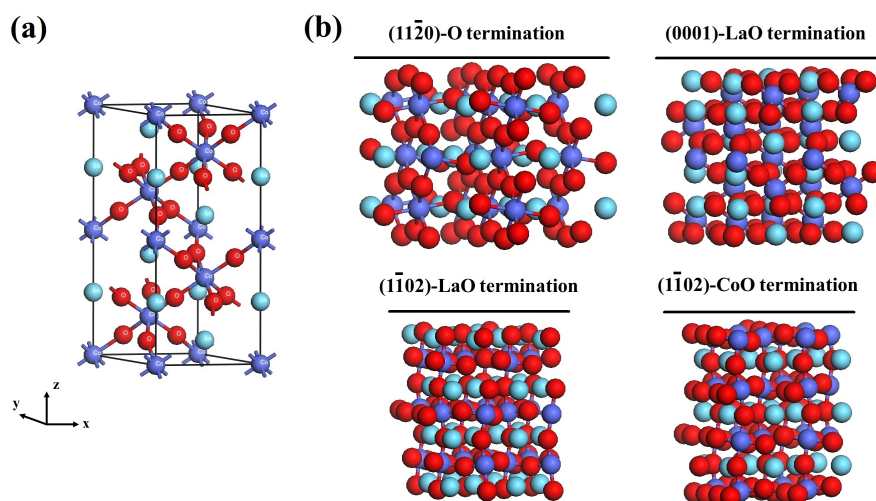

Figure S2 (color online) Schematic unit cell (a) and four stable terminations (b) of hexagonal LaCoO<sub>3</sub>.

**Table S1.** LaCoO<sub>3</sub>'s structural parameters of our calculation and experiment in reference.

| Structural parameters |             |                         |                      |
|-----------------------|-------------|-------------------------|----------------------|
| Parameters            | Calculation | Experiment <sup>1</sup> | Percentage Error (%) |
| a=b (Å)               | 5.426       | 5.426                   | 0.00                 |
| c (Å)                 | 12.950      | 12.991                  | 0.32                 |
| c/a                   | 2.387       | 2.394                   | 0.29                 |
| La-O (Å)              | 2.384       | 2.428                   | 1.81                 |
| La-O (Å)              | 3.042       | 2.999                   | 1.43                 |
| La-O (Å)              | 2.687       | 2.688                   | 0.03                 |
| Co-O (Å)              | 1.930       | 1.925                   | 0.25                 |
| ∠O-Co-O               | 91.79       | 91.48                   | 0.34                 |
| ∠Co-O-Co              | 160.38      | 162.93                  | 1.57                 |

Compared with the experimental structural properties of LaCoO<sub>3</sub>, our calculating results were in good agreement with the experiments, which indicated our computational method was an accurate and reliable approach to investigate the catalytic performance of LaCoO<sub>3</sub>.

**Table S2.** The ground state energy of LaCoO<sub>3</sub> (La, Co) bulk and all slabs.  $N_{La}$ ,  $N_{Co}$  and  $N_O$  are the number of atoms corresponding to La, Co and O elements in slabs.

| Surface-terminations         | $E_{slab}$ (eV)      | $N_{La}$             | $N_{Co}$             | $N_O$ |
|------------------------------|----------------------|----------------------|----------------------|-------|
| (0001)-Co                    | -769.484             | 20                   | 24                   | 60    |
| (0001)-LaO                   | -867.455             | 24                   | 20                   | 72    |
| (10 $\bar{1}$ 0)-LaCoO       | -491.701             | 14                   | 14                   | 38    |
| (10 $\bar{1}$ 0)-O           | -391.576             | 10                   | 10                   | 34    |
| (11 $\bar{2}$ 0)-LaCoO       | -798.886             | 24                   | 24                   | 60    |
| (11 $\bar{2}$ 0)-O           | -734.861             | 18                   | 18                   | 66    |
| (1 $\bar{1}$ 02)-CoO         | -1049.685            | 24                   | 32                   | 88    |
| (1 $\bar{1}$ 02)-LaO         | -1039.826            | 32                   | 24                   | 80    |
| $E_{LaCoO_3} = -37.99$<br>eV | $E_{La} = -19.69$ eV | $E_{Co} = -14.19$ eV | $E_{O_2} = -9.86$ eV |       |

In Table S2,  $E_{LaCoO_3}$  was the total energy of bulk per formula unit LaCoO<sub>3</sub>.  $E_{La}$

was the total energy of perfect La crystal which was hexagonal structure with four atoms in the unit cell. As the same,  $E_{Co}$  was the total energy of cubic Co crystal with two atoms and  $E_{O_2}$  was the energy of  $O_2$  molecule. In the article,  $\mu_{La}^0 = E_{La}/4$ ,  $\mu_{Co}^0 = E_{Co}/2$ ,  $\mu_{O}^0 = E_{O_2}/2$ .

## Reference

1. P. G. Radaelli and S. W. Cheong, *Phys. Rev. B*, 2002, **66**, 094408.
